# Supplementary material
Source: PubMed Central journal article supplement (PMC3549882)

## **Supplemental Material to:**

**Alba Fernández-Sánchez, Aroa Baragaño Raneros, Reyes Carvajal Palao, Ana B. Sanz, Alberto Ortiz, Francisco Ortega, Beatriz Suárez-Álvarez and Carlos López-Larrea**

**DNA demethylation and histone H3K9 acetylation determine the active transcription of the NKG2D gene in human CD8<sup>+</sup> T and NK cells**

**Epigenetics 2013; 8(1)**

**<http://dx.doi.org/10.4161/epi.23115>**

**<http://www.landesbioscience.com/journals/epigenetics/article/23115>**

Figure S1

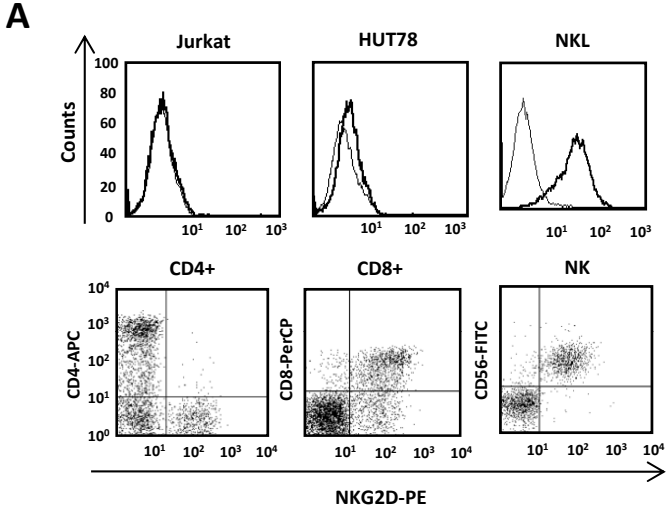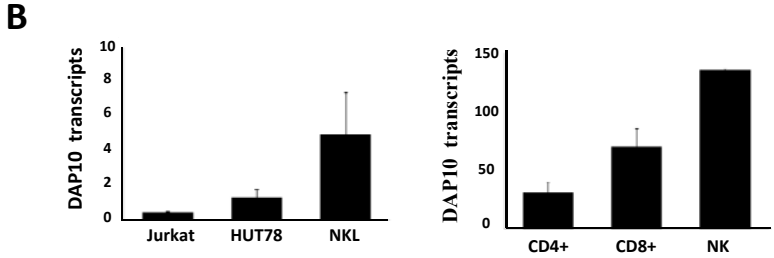

Figure S2

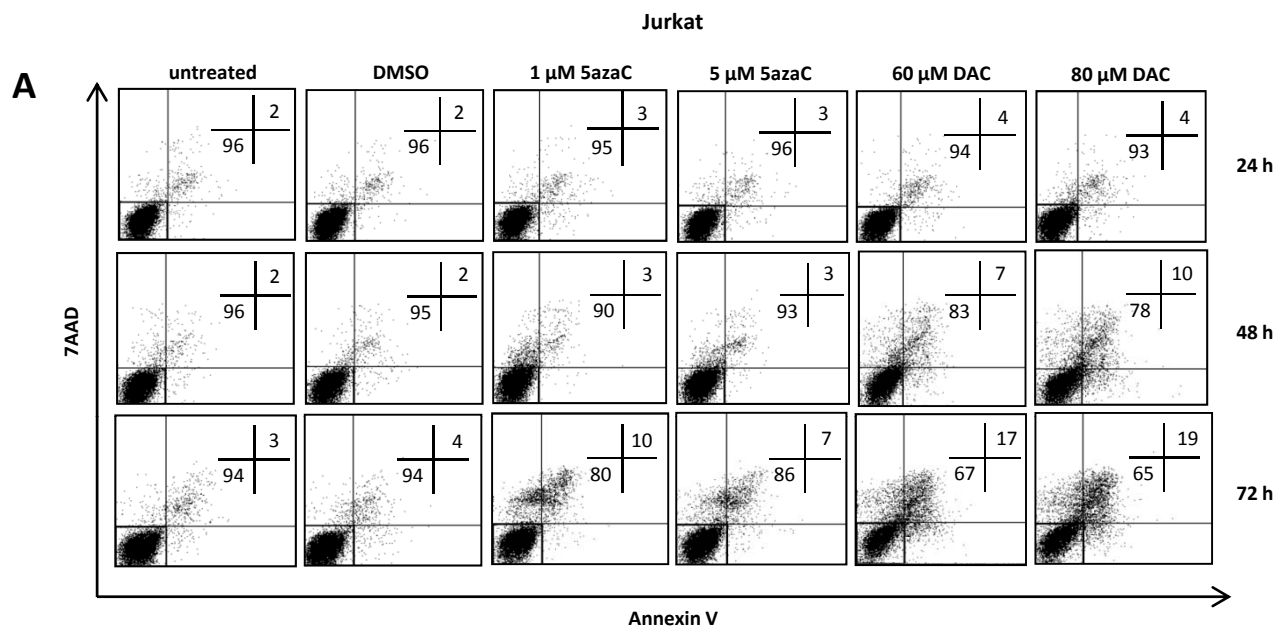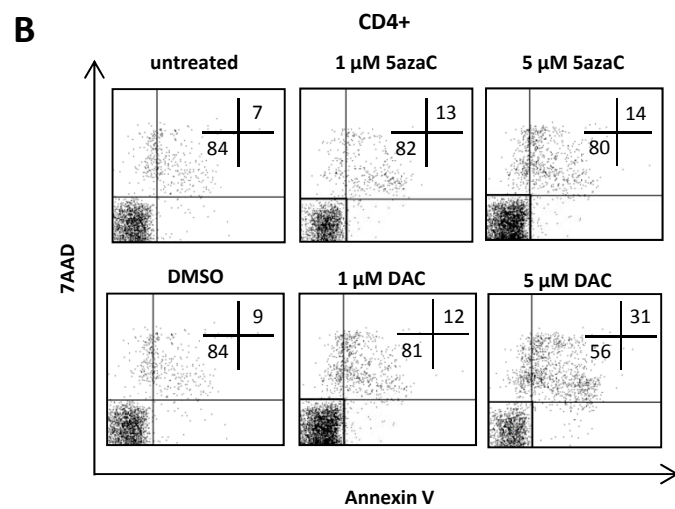

**Figure S3**

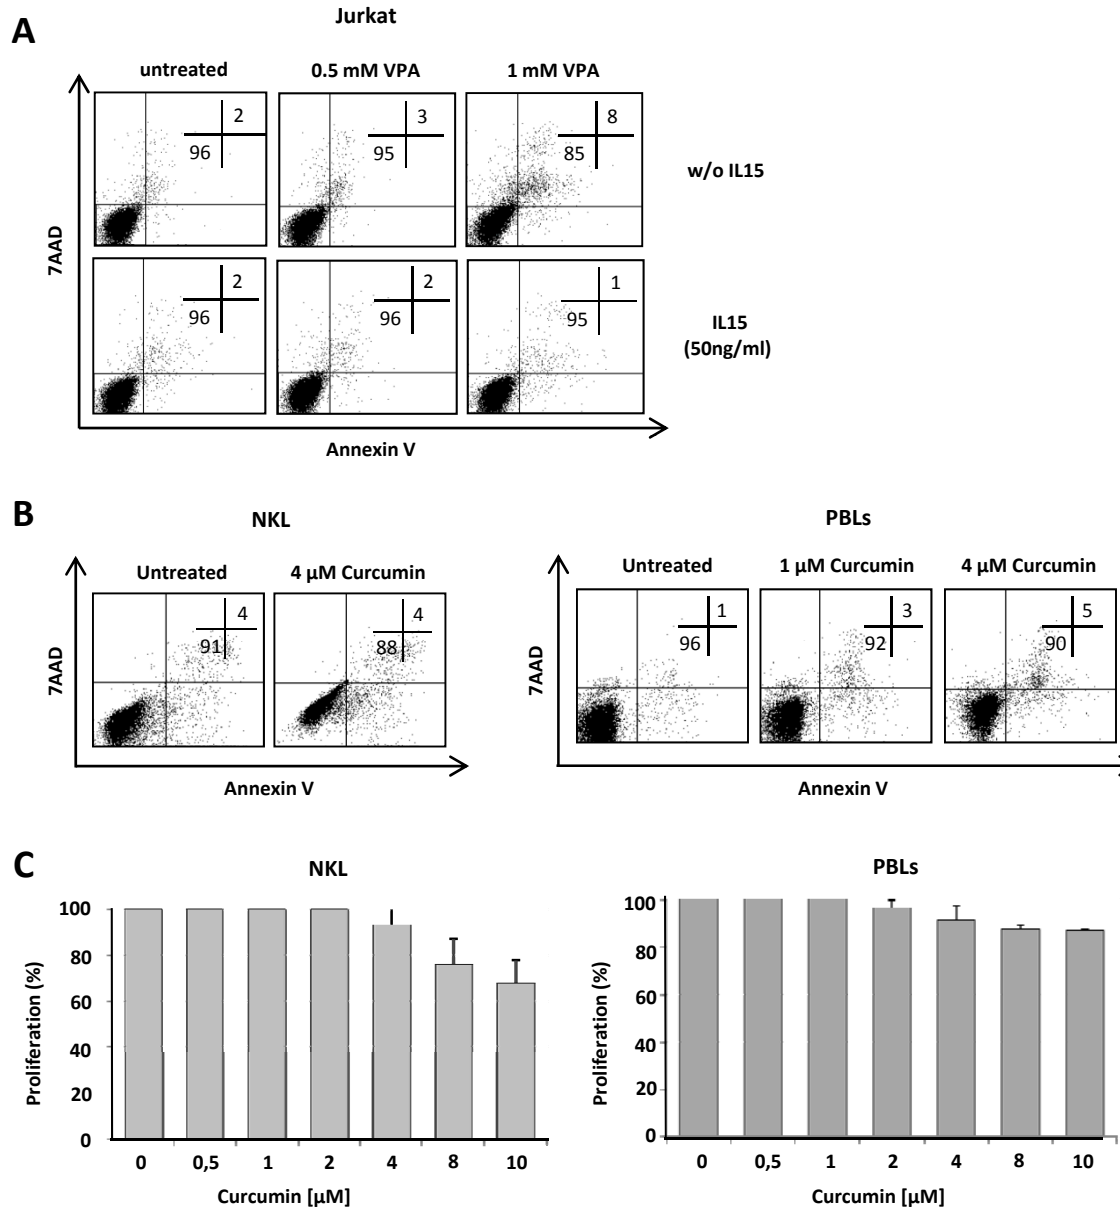

Supplement: epi-8-66-s01.pdf [file epi-8-66-s01.pdf]
